# Supplementary material for: Multifunctional Fe3O4/TiO2/NH2–UiO–66 with integrated interfacial features for favorable phosphate adsorption
Source: Royal Society of Chemistry journal article supplement (doi:10.1039/d2nj02852b), 2022-01-01
Supplement: d2nj02852b1.pdf [file d2nj02852b1.pdf]

1 **Multifunctional Fe<sub>3</sub>O<sub>4</sub>/TiO<sub>2</sub>/NH<sub>2</sub>-UiO-66 with integrated interfacial features for**  
2 **favorable phosphate adsorption**

3 Liyu Yang †<sup>a</sup>, Shangui Zhang †<sup>b</sup>, Xiangcheng Shan <sup>a</sup>, Chang-sik Ha <sup>c</sup>, Qingda An <sup>a</sup>,  
4 Zuoyi Xiao <sup>a</sup>, Li Wei <sup>\*a</sup>, Shangru Zhai <sup>\*a</sup>

5 <sup>a</sup> *Liaoning Key Lab of Lignocellulose Chemistry and BioMaterials, Liaoning*  
6 *Collaborative Innovation Center for Lignocellulosic Biorefinery, College of Light*  
7 *Industry and Chemical Engineering, Dalian Polytechnic University, Dalian 116034,*  
8 *China*

9 <sup>b</sup> *Marine Chemical Research Institute Co., Ltd., Qingdao 266071, China ;State Key*  
10 *Laboratory of Marine Coatings*

11 <sup>c</sup> *Department of Polymer Science and Engineering, Pusan National University,*  
12 *Republic of Korea*

13 † *Their contributed equally to this work*

14

15

16

17

18

19 **\*Corresponding author**

20 Tel.: (+86) 411-8632-3649; Fax: (+86) 411-8632-364679

21 E-mail address: [lucy\\_weili@163.com](mailto:lucy_weili@163.com); [zhairschem@163.com](mailto:zhairschem@163.com)

---

## 22 1. Supporting texts

### 23 Text S1. Materials

24  $\text{FeCl}_3 \cdot 6\text{H}_2\text{O}$ ,  $\text{CH}_3\text{COONa}$  (NaAC), Ethylene glycol ( $\text{C}_2\text{H}_6\text{O}_2$ ), Acetonitrile  
25 ( $\text{CH}_3\text{CN}$ ), Acetone ( $\text{CH}_3\text{COCH}_3$ ),  $\text{NaOH}$  (AR,  $\geq 96.0\%$ ), Acetic acid ( $\text{CH}_3\text{COOH}$ ),  
26 Ammonia solution ( $\text{NH}_3$ , AR, 25%) and N,N-dimethylformamide (DMF) were  
27 purchased from Tianjin Kermel Chemical Reagent Co., Ltd., Zirconium(IV) chloride  
28 ( $\text{ZrCl}_4$ ) and 2-Aminoterephthalic acid ( $\text{H}_2\text{ATA}$ ,  $\text{C}_8\text{H}_7\text{NO}_4$ ) were provided by Macklin,  
29 Polyethylene glycol (PEG,  $\text{HO}(\text{CH}_2\text{CH}_2\text{O})_n\text{H}$ , average Mn 4000) was purchased from  
30 Aladdin Reagent, Ethanol ( $\text{CH}_3\text{CH}_2\text{OH}$ , AR,  $\geq 99.7\%$ ) and  $\text{KH}_2\text{PO}_4$  were provided by  
31 Tianjin Fuyu Fine Chemical Co., Ltd., Hydrochloric acid ( $\text{HCl}$ , GR, 36.0~38.0%),  
32 Cetyltrimethylammonium bromide (CTAB,  $\text{C}_{19}\text{H}_{42}\text{BrN}$ , 99.0%) and Tetra-n-butyl  
33 titanate (TBOT,  $\text{C}_{16}\text{H}_{36}\text{O}_4\text{Ti}$ , CP,  $\geq 98.0\%$ ) were provided by Sinopharm Chemical  
34 ReagentCo. All chemical reagents are used directly in the absence further processing.

### 35 Text S2.1 Synthesis of $\text{Fe}_3\text{O}_4$

36 2.5 g of  $\text{FeCl}_3 \cdot 6\text{H}_2\text{O}$ , 7.2 g of NaAC and 2 g of PEG were mixed with 80 mL of  
37 Ethylene glycol. After continuous stirring until it was completely dissolved, it was  
38 added to a 100 mL Teflon autoclave and reacted at 200 °C for 8 h. After its  
39 temperature drops to 25 °C, it is separated by an applied magnetic field, rinsed with  
40 deionized water (DW) and ethanol three times, respectively. And freeze-dried for 12 h.

### 41 Text S2.2 Synthesis of $\text{TiO}_2$

42 4 mL of tetrabutyl titanate was dissolved in 60 mL of acetone, and after magnetic

---

43 stirring at 25 °C for 30 min, it was transferred to a 100 mL Teflon reaction kettle. The  
44 reaction was carried out at 180 °C for 12 h. After cooling to room temperature,  
45 suction filtration and washing with ethanol three times, and then drying in a vacuum  
46 drying oven at 80 °C overnight. The dried samples were heated to 200 °C at a rate of  
47 5 °C/min and held for 2 h in a muffle furnace to obtain TiO<sub>2</sub>.

#### 48 **Text S2.2 Synthesis of NH<sub>2</sub>-UiO-66**

49 Add 0.2 g of ZrCl<sub>4</sub> and 0.156 g of H<sub>2</sub>ATA to 30 mL of DMF in an ultrasonic  
50 environment, respectively. Then make it evenly dispersed for 30 min. The mixture  
51 was transferred to a 100 mL polytetrafluoroethylene reaction kettle, and reacted in an  
52 oven at 120 °C for 24 h. After cooling to room temperature, the samples were washed  
53 three times with ethanol and DMF, respectively. Finally, it was dried overnight in a  
54 vacuum drying oven at 80 °C to obtain NH<sub>2</sub>-UiO-66.

#### 55 **Text S3. Details of characterizations**

56 The morphology of Fe<sub>3</sub>O<sub>4</sub>/TiO<sub>2</sub>/NH<sub>2</sub>-UiO-66 was observed utilizing  
57 transmission/scanning electron microscope (TEM; JEM, Japan)/(SEM, JEOL, Japan)  
58 and the elemental composition and content were analyzed by energy spectrometer  
59 (EDS, Oxford, UK). Fourier transform infrared spectra (FT-IR, 5700, Nicolet, USA)  
60 was used to study the functional groups of adsorbents. Crystallization properties of  
61 materials were investigated by X-ray diffractometer (XRD, 7000S, Japan). The N<sub>2</sub>  
62 adsorption-desorption isotherms and specific surface area were described by  
63 Brunauer-Emmett-Teller (BET) method at 77 K via JW-BK222 analyzer. The

---

64 adsorption mechanism of phosphate was studied by X-ray photoelectron spectrum  
65 (XPS, ESCALAB250, Thermo VG, USA ) and Zeta potentials (3000HSA, UK). The  
66 concentration of residual phosphorus after adsorption was determined by  
67 molybdenum blue spectrophotometry with UV-Vis spectrophotometer (UV-754N  
68 Shanghai, China). Thermogravimetric analysis (TGA) and differential  
69 thermogravimetric (DTG) were studied with TG the temperature spectrum from 30 to  
70 800 °C at a rate of 5 °C/min under nitrogen. The magnetic field intensity of magnetite  
71 before and after adsorption was measured using a vibrating sample magnetometer  
72 (VSM, Lake shore 7400). The content of Fe, Ti and Zr in the solution after phosphate  
73 adsorption was measured by ICP-MS (Samefi, USA).

#### 74 **Text S4. Details of Fig S1.**

75 The effects of  $\text{Fe}_3\text{O}_4/\text{TiO}_2/\text{NH}_2\text{-UiO-66}$  adsorbents synthesized with different  
76 mass ratios of  $\text{Fe}_3\text{O}_4/\text{TiO}_2$  and  $\text{ZrCl}_4$  on the phosphate adsorption performance were  
77 investigated through preliminary evaluation experiments. 20 mg of adsorbents in  
78 different ratios were added to 20 mL of phosphate solution with an initial  
79 concentration of 100 mg/L, and the experimental results obtained after 24 h of static  
80 adsorption are shown in **Fig. S1**. When the mass ratio of  $\text{Fe}_3\text{O}_4/\text{TiO}_2$  to  $\text{ZrCl}_4$  is 1:2,  
81 the adsorption capacity is in the optimal state, so this ratio of adsorbents will be used  
82 in subsequent experiments.

#### 83 **Text S5. Elemental composition analysis**

84 From the comparison of Fig S(2, 3), it can be seen that the peak of P element

---

85 appears in the spectrum after adsorption, which corresponds to the elements in Table  
86 S(1, 2). After adsorption, the content of O element increased from 44.16wt% to  
87 47.89wt%, and the content of P element was 1.23wt%, which proved the successful  
88 adsorption of phosphate.

### 89 **Text S6. Adsorption isotherms models**

90 Langmuir model:

$$91 \quad q_e = \frac{q_m K_L C_e}{1 + K_L C_e} \quad (S1)$$

92 Freundlich model:

$$93 \quad q_e = K_F C_e^{\frac{1}{n}} \quad (S2)$$

94 where  $K_F$  (mg/g) and  $n$  are two empirical constants of Freundlich model,  $q_m$  (mg/g) is  
95 the maximum adsorption capacity of phosphate,  $q_e$  (mg/g) is the adsorption capacities  
96 at adsorption equilibrium,  $C_e$  (mg/L) is the concentration of residual phosphate  
97 solution after adsorption.  $K_L$  (L/mg) is the Langmuir constant.

### 98 **Text S7. Adsorption kinetics models**

99 Pseudo-first-order model (PFO) :

$$100 \quad \ln(q_e - q_t) = \ln q_e - K_1 t \quad (S3)$$

101 Pseudo-second-order model (PSO) :

$$102 \quad \frac{t}{q_t} = \frac{1}{K_2 q_e^2} + \frac{t}{q_e} \quad (S4)$$

103 Intraparticle diffusion model:

$$104 \quad q_t = k_t t^{0.5} + \theta \quad (S5)$$

105

106 where  $q_e$  (mg/g) and  $q_t$  (mg/g) are the adsorption capacities at adsorption equilibrium

---

107 and at time  $t$  (min), and  $K_1$  ( $\text{min}^{-1}$ ) and  $K_2$  ( $\text{g}/(\text{mg}\cdot\text{min})$ ) are the rate constants.  $k_i$   
108 ( $\text{mg}/\text{g}\cdot\text{min}^{-1/2}$ ) and  $\theta$  were the intercepts of diffusion coefficient and internal diffusion  
109 model, respectively.

110 **Text S8. Competitive adsorption of coexisting anionic ions.**

111 
$$K_d = \frac{(C_0 - C_e)}{C_e} \times \frac{V}{m} \quad (\text{S6})$$

112 where  $K_d$  is the distribution coefficient.

113 **Text S9. Adsorption thermodynamics**

114 The thermodynamic parameters of  $\text{Fe}_3\text{O}_4/\text{TiO}_2/\text{NH}_2\text{-UiO-66}$  adsorption of  
115 phosphate including Gibbs free energy  $\Delta G^0$  (kJ/mol), entropy change  $\Delta S^0$  (J/mol·K)  
116 and enthalpy change  $\Delta H^0$  (kJ/mol) were calculated by the following equations  
117 (Equations S(7)-(10)):

118 
$$\Delta G^0 = \Delta H^0 - T\Delta S^0 \quad (\text{S7})$$

119 
$$\ln K_d = \frac{\Delta S^0}{R} - \frac{\Delta H^0}{RT} \quad (\text{S8})$$

120 
$$\Delta G^0 = -RT \ln K_d \quad (\text{S9})$$

121 
$$K_d = \frac{q_e}{C_e} \quad (\text{S10})$$

122 where  $R$  is the ideal gas constant (J/mol·K) and  $T$  is the absolute temperature (K);  $K_d$   
123 is the adsorption thermodynamic equilibrium constant;  $q_e$  (mg/g) is the adsorption  
124 capacities at adsorption equilibrium;  $C_e$  (mg/L) is the concentration of residual  
125 phosphate solution after adsorption.

126 **Text S10. Calculation method**

127 To gain a more detailed understanding of the adsorption mechanism and

---

128 configuration of Fe<sub>3</sub>O<sub>4</sub>/TiO<sub>2</sub>/NH<sub>2</sub>-UiO-66 on phosphate, DFT calculations were  
129 performed. Since the contribution of NH<sub>2</sub>-UiO-66 in the whole adsorbent is relatively  
130 large, NH<sub>2</sub>-UiO-66 is selected for the calculation study. Using the DMol3 code in the  
131 Materials studio software, the results of the adsorption experiment were theoretically  
132 described, and the phosphate adsorption mechanism was further explained. First-  
133 principles studies are based on the generalized gradient approximation (GGA) and the  
134 Perdew-Burke-Ernzerhof (PBE) methods. The formula for calculating the adsorption  
135 energy ( $E_{\text{ads}}$ ) between the adsorbent molecule and phosphate is as follows:

$$136 \quad E_{\text{ads}} = E(\text{total}) - E(\text{adsorbent}) - E(\text{phosphate}) \quad (\text{S11})$$

137 where  $E(\text{total})$ ,  $E(\text{adsorbent})$  and  $E(\text{phosphate})$  are the total energies of the adsorbed  
138 system, the adsorbent molecule and one energy of phosphate, respectively.

---

139 **2. Supporting Figures and Tables**

140 **Fig S1.** Preliminary evaluation of adsorbents with different ratios of  $\text{Fe}_3\text{O}_4/\text{TiO}_2$  and  
141  $\text{ZrCl}_4$ .

142 **Fig S2.** EDS spectrum of  $\text{Fe}_3\text{O}_4/\text{TiO}_2/\text{NH}_2\text{-UiO-66}$  before phosphate adsorption.

143 **Fig S3.** EDS spectrum of  $\text{Fe}_3\text{O}_4/\text{TiO}_2/\text{NH}_2\text{-UiO-66}$  after phosphate adsorption.

144 **Fig S4.** Nitrogen adsorption-desorption curves of (a)  $\text{Fe}_3\text{O}_4$ ; (b)  $\text{TiO}_2$ ; (c)  $\text{NH}_2\text{-UiO-}$   
145  $66$ ; (d)  $\text{Fe}_3\text{O}_4/\text{TiO}_2$ ; (e)  $\text{Fe}_3\text{O}_4/\text{TiO}_2/\text{NH}_2\text{-UiO-66}$ ; (f)  $\text{Fe}_3\text{O}_4/\text{TiO}_2/\text{NH}_2\text{-UiO-66-P}$ .

146 **Fig S5.** Pore size distributions of (a)  $\text{Fe}_3\text{O}_4$ ; (b)  $\text{TiO}_2$ ; (c)  $\text{NH}_2\text{-UiO-66}$ ; (d)  
147  $\text{Fe}_3\text{O}_4/\text{TiO}_2$ ; (e)  $\text{Fe}_3\text{O}_4/\text{TiO}_2/\text{NH}_2\text{-UiO-66}$ ; (f)  $\text{Fe}_3\text{O}_4/\text{TiO}_2/\text{NH}_2\text{-UiO-66-P}$ .

148 **Fig S6.** TG-DTG curves of  $\text{Fe}_3\text{O}_4/\text{TiO}_2/\text{NH}_2\text{-UiO-66}$ .

149 **Fig S7.** Magnetization curves of  $\text{Fe}_3\text{O}_4$ ,  $\text{Fe}_3\text{O}_4/\text{TiO}_2/\text{NH}_2\text{-UiO-66}$  and  
150  $\text{Fe}_3\text{O}_4/\text{TiO}_2/\text{NH}_2\text{-UiO-66-P}$ .

151 **Fig S8.** Effect of dosage on phosphate adsorption capacity.

152 **Fig S9.** (a) Effect of temperature on phosphate adsorption; (b) The point-line graph of  
153  $\ln K_d$  and  $1/T$ .

154 **Table S1.** Element ratios of  $\text{Fe}_3\text{O}_4/\text{TiO}_2/\text{NH}_2\text{-UiO-66}$  before phosphate adsorption.

155 **Table S2.** Element ratios of  $\text{Fe}_3\text{O}_4/\text{TiO}_2/\text{NH}_2\text{-UiO-66}$  after phosphate adsorption.

156 **Table S3.** Kinetic arguments of the phosphate adsorption process.

157 **Table S4.** The thermodynamic parameters of  $\text{Fe}_3\text{O}_4/\text{TiO}_2/\text{NH}_2\text{-UiO-66}$ .



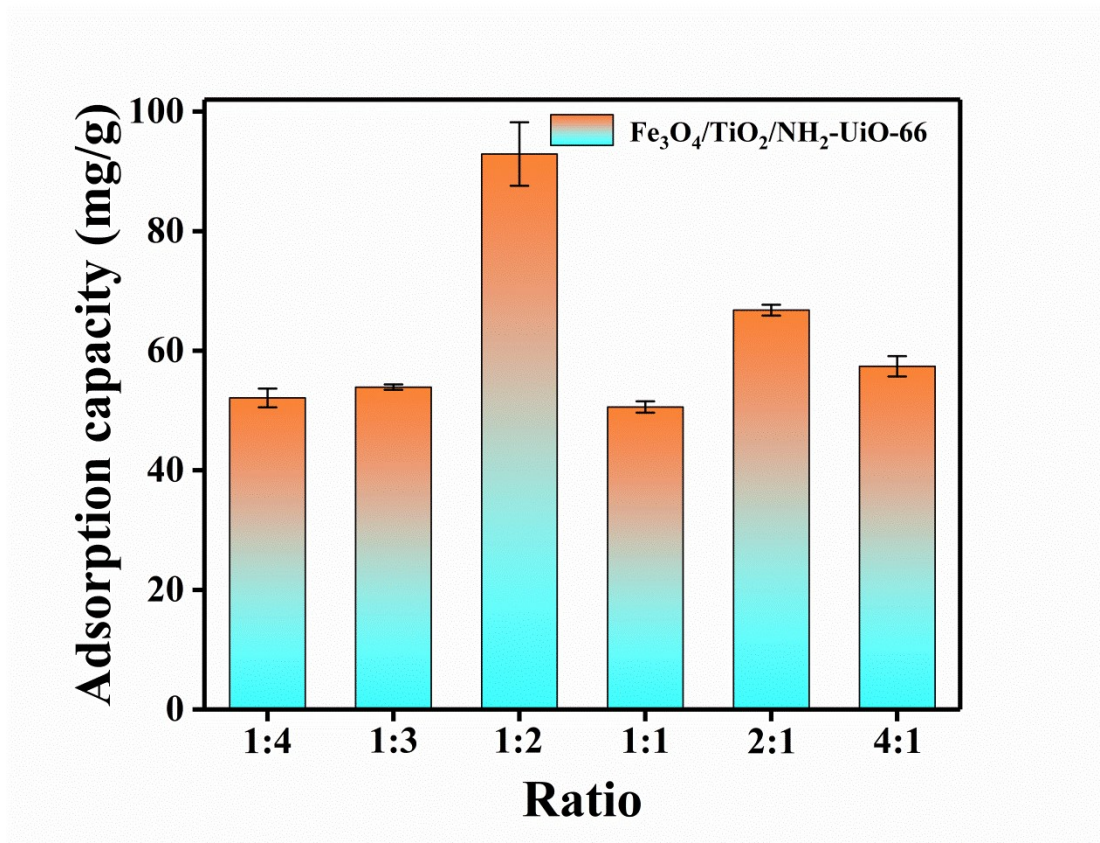

158

159 Fig S1.

160

161

162

163

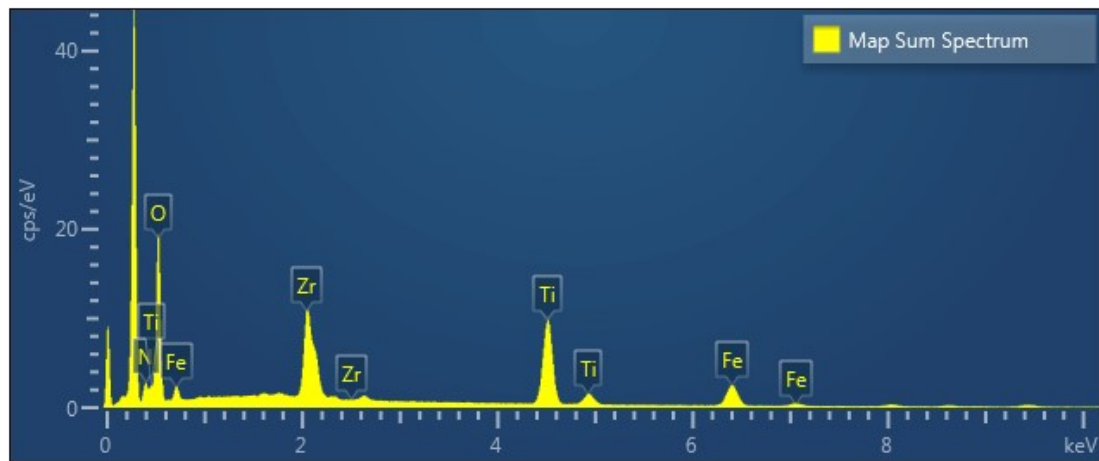

164

165 **Fig S2.**

166

167

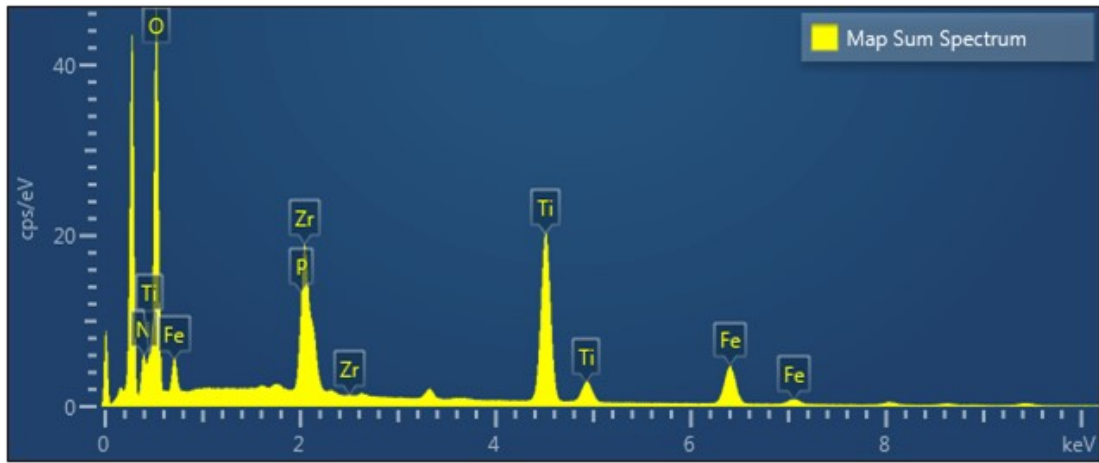

168

169 **Fig S3.**

170

171

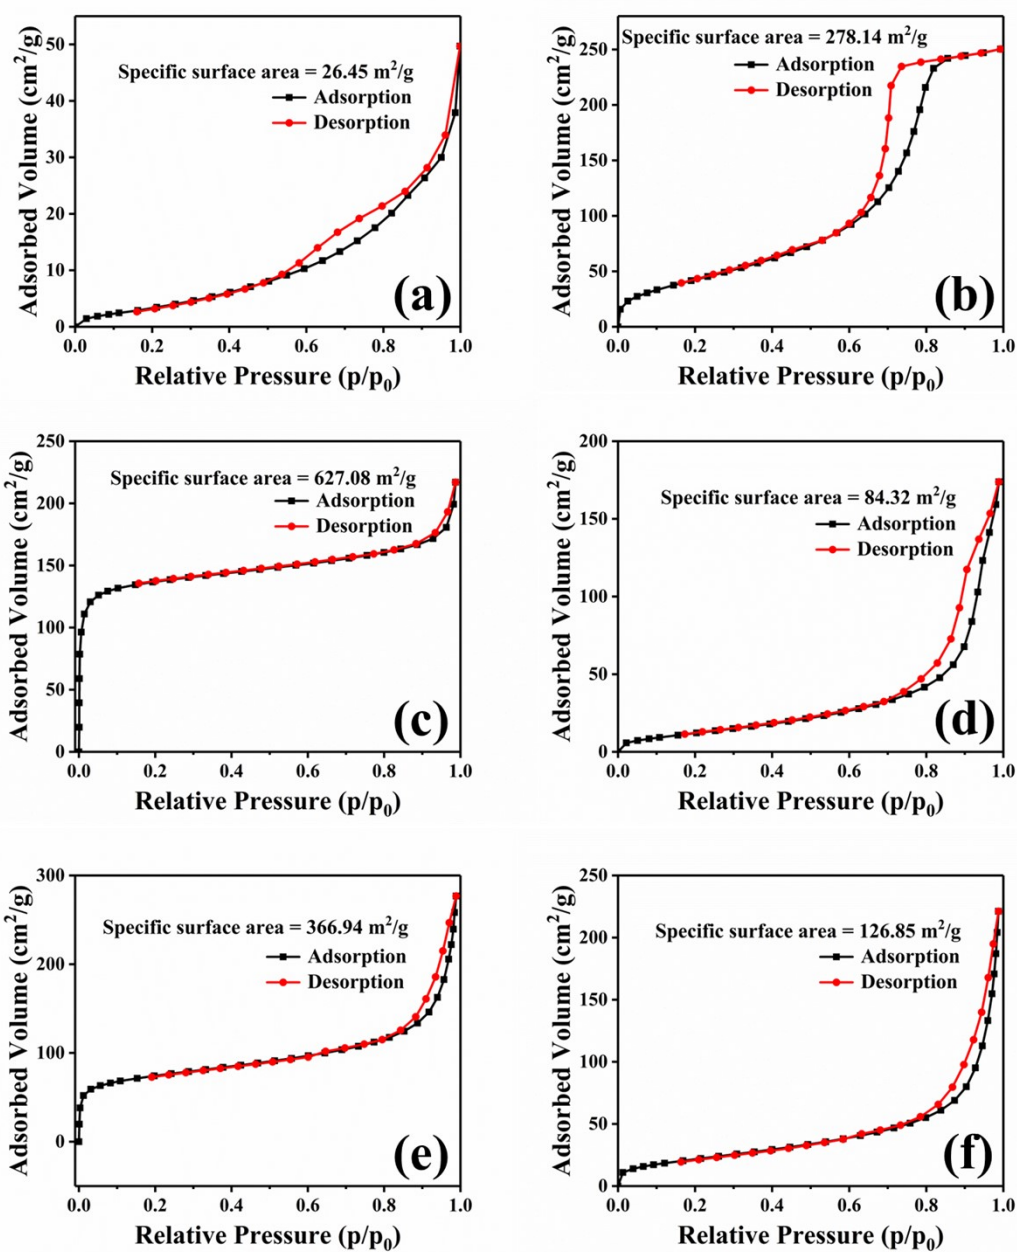

172

173 **Fig S4.**

174

175

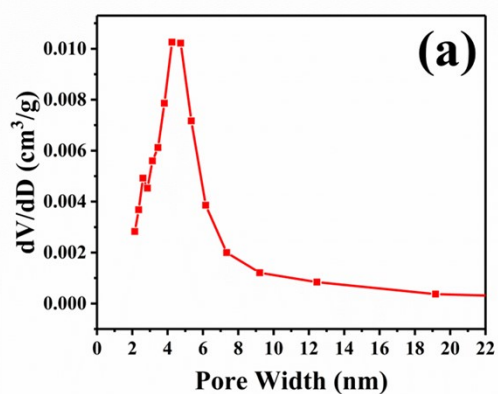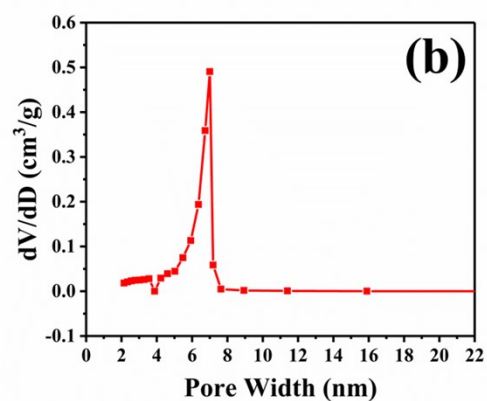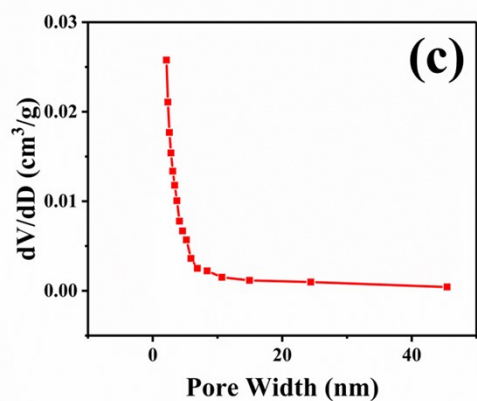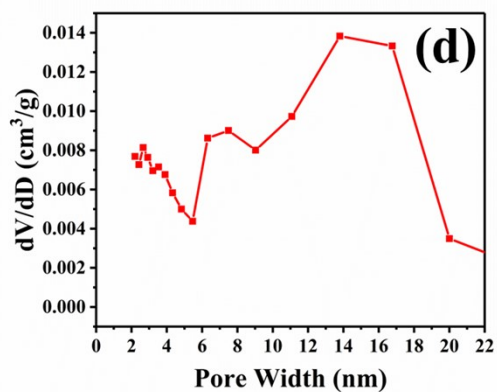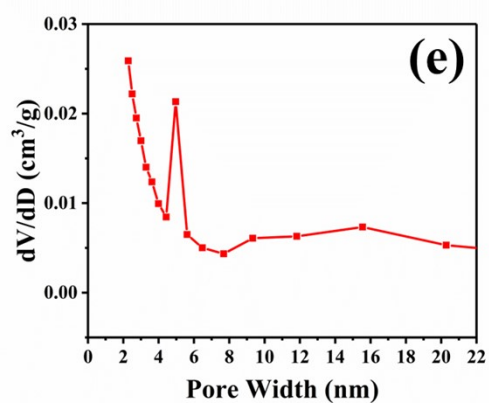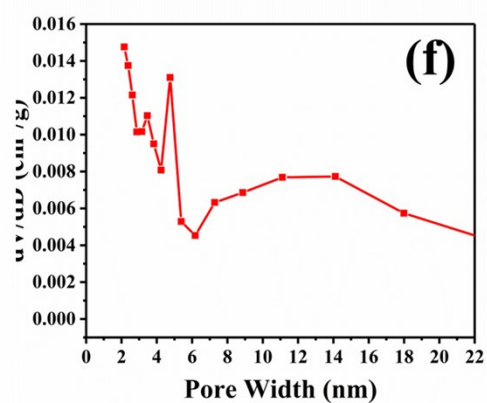

176

177 Fig S5.

178

179

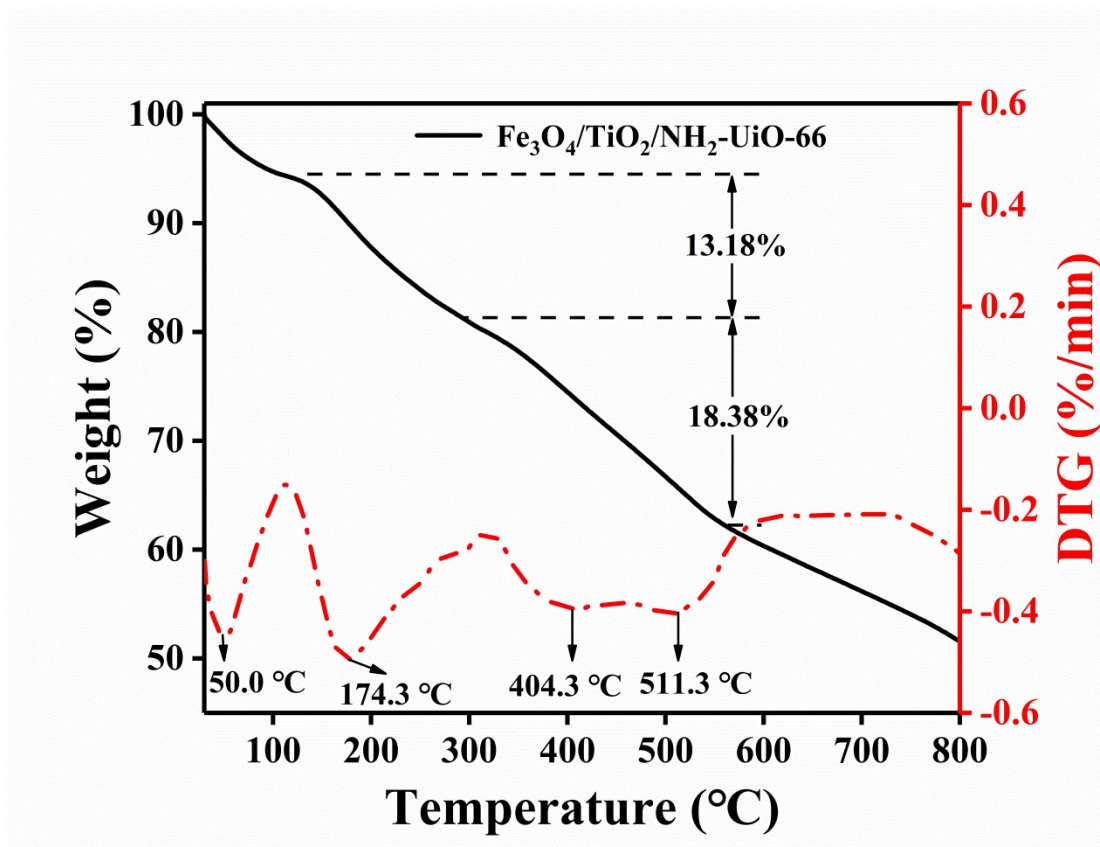

180

181 Fig. S6

182

183

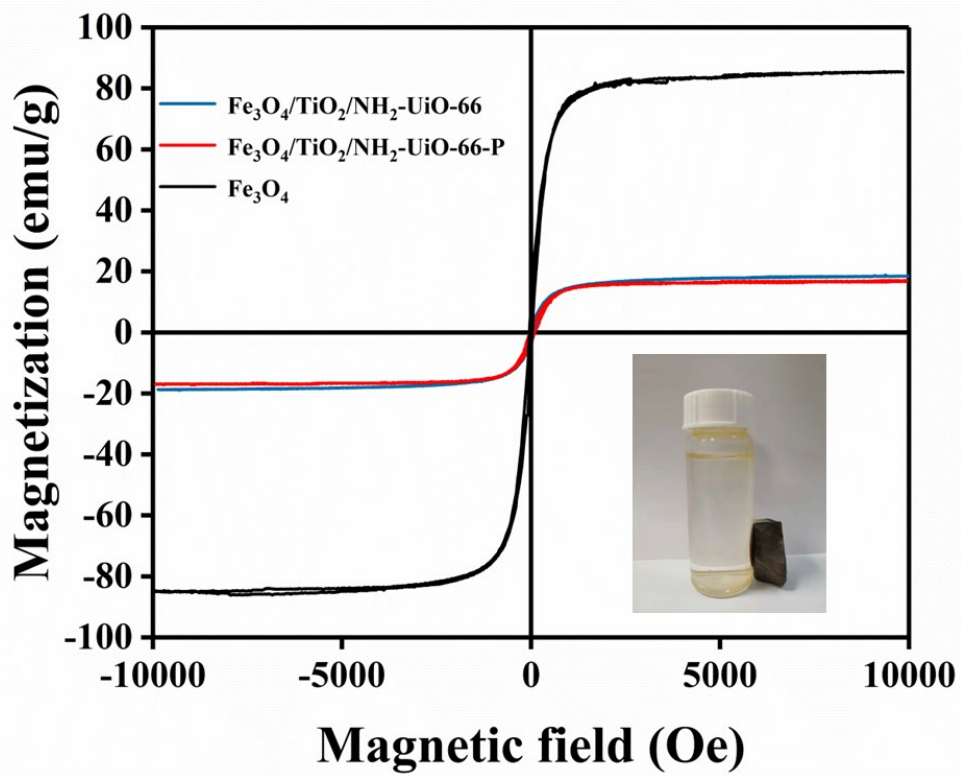

184

185 Fig S7

186

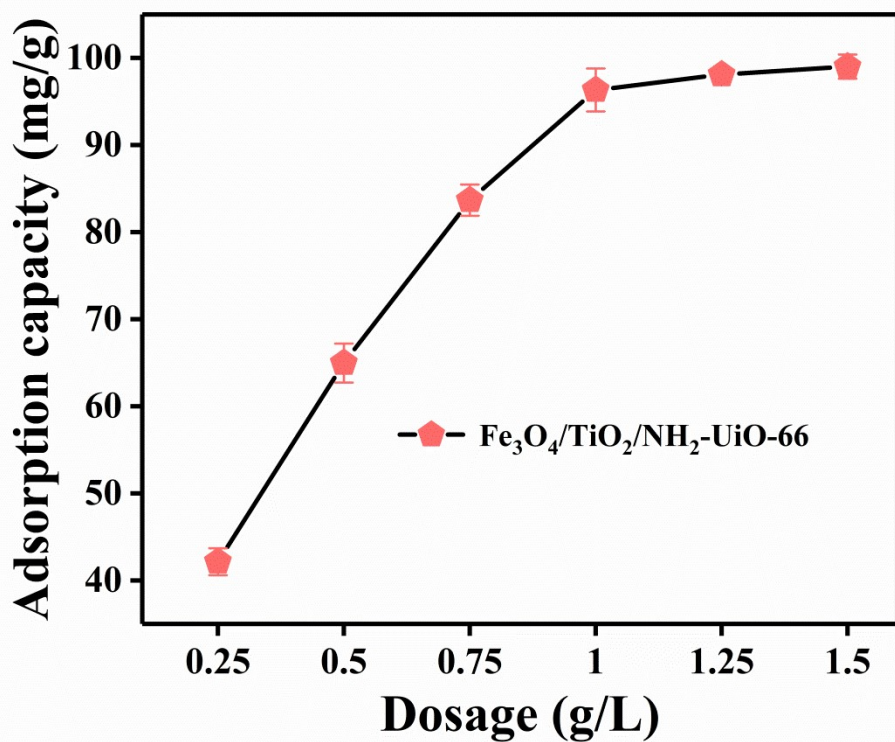

187

188 Fig S8.

189

190



191

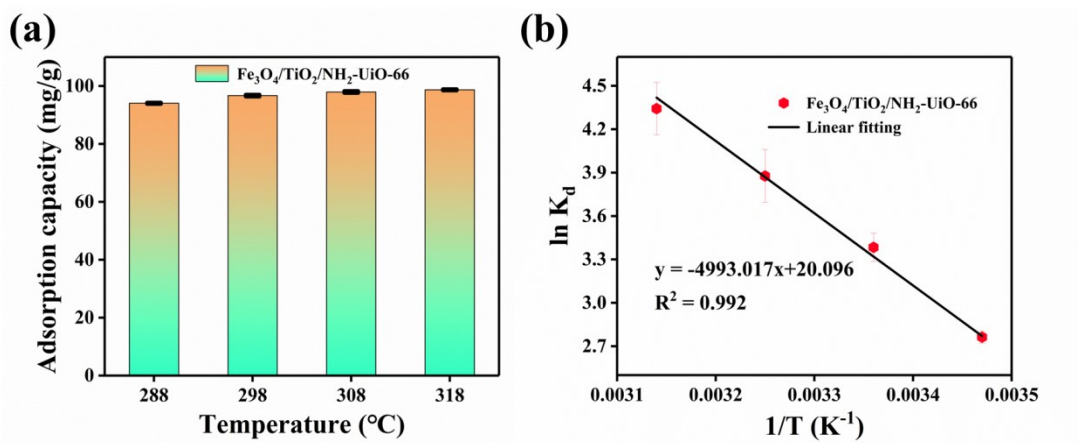

192

193 **Fig S9.**

194

195

---

196 **Table S1.**

197

| Element | Line Type | Apparent Concentration | k Ratio | Wt%    |
|---------|-----------|------------------------|---------|--------|
| N       | K series  | 1.69                   | 0.00302 | 1.81   |
| O       | K series  | 15.71                  | 0.05813 | 42.36  |
| Ti      | K series  | 12.09                  | 0.12091 | 23.33  |
| Fe      | K series  | 6.88                   | 0.06882 | 13.52  |
| Zr      | L series  | 8.75                   | 0.08746 | 18.98  |
| Total:  |           |                        |         | 100.00 |

198

199

---

200 **Table S2.**

201

| Element | Line Type | Apparent Concentration | k Ratio | Wt%    |
|---------|-----------|------------------------|---------|--------|
| N       | K series  | 1.35                   | 0.00263 | 1.14   |
| O       | K series  | 23.16                  | 0.08409 | 44.39  |
| P       | K series  | 1.98                   | 0.00744 | 1.83   |
| Ti      | K series  | 15.67                  | 0.15670 | 23.75  |
| Fe      | K series  | 8.19                   | 0.08195 | 12.74  |
| Zr      | L series  | 9.45                   | 0.08414 | 16.15  |
| Total:  |           |                        |         | 100.00 |

202

203

204

205 **Table S3.**

206

---

|          | Pseudo-first-order model |               |       | Pesudo-second-order model |                    |       |
|----------|--------------------------|---------------|-------|---------------------------|--------------------|-------|
|          | $q_e$ (mg/g)             | $k_1$ (1/min) | $R^2$ | $q_e$ (mg/g)              | $k_2$ (g/(mg·min)) | $R^2$ |
| 100 mg/L | 79.954                   | 0.0872        | 0.730 | 83.294                    | 0.0020             | 0.981 |
| 200 mg/L | 148.201                  | 0.0431        | 0.815 | 157.746                   | 0.0005             | 0.975 |

---

207

208 **Table S4.**

209

---

| T   | $K_d$  | $\ln(K_d)$ | $\Delta G^0$ (KJ/mol) | $\Delta H^0$ (KJ/mol) | $\Delta S^0$ (J/mol·K) | $R^2$ |
|-----|--------|------------|-----------------------|-----------------------|------------------------|-------|
| (K) |        |            |                       |                       |                        |       |
| 288 | 15.847 | 2.763      | -6.616                |                       |                        |       |
| 298 | 29.459 | 3.383      | -8.382                |                       |                        |       |
| 308 | 48.279 | 3.877      | -9.928                | 41.512                | 167.078                | 0.992 |
| 318 | 76.938 | 4.343      | -11.482               |                       |                        |       |

---

210
